# Supplementary material
Source: publisher figshare collection journal article supplement (https://karger.figshare.com/ndownloader/files/17485490)
Supplement: Supplementary file 1 [file 17485490]

**Supplementary Table S3. Differentially expressed lncRNAs between NC group and BMP2-treated group.**

| #ID | NC RPKM | BMP2 RPKM |
| --- | --- | --- |
| TCONS_00016496 | 0.001061 | 0.528905 |
| TCONS_00002118 | 0.508607 | 3.26E-41 |
| TCONS_00011776 | 0.040681 | 1.08595 |
| TCONS_00022914 | 3.69E-138 | 0.60543 |
| TCONS_00024123 | 1.13E-148 | 0.546577 |
| TCONS_00014087 | 5.27195 | 1.28799 |
| TCONS_00018068 | 2.59E-05 | 0.486409 |
| TCONS_00032068 | 1.12E-255 | 1.27009 |
| TCONS_00028503 | 0.411602 | 8.34E-11 |
| TCONS_00028539 | 0.547463 | 0.001492 |
| TCONS_00035245 | 10.936 | 1.55736 |
| TCONS_00033892 | 0.395404 | 0.000243 |
| TCONS_00037906 | 4.99E-15 | 0.279912 |
| TCONS_00035646 | 0.533064 | 3.70E-06 |
| TCONS_00037295 | 1.32E-10 | 0.801241 |
| TCONS_00038825 | 0.247196 | 0.719981 |
| TCONS_00042518 | 0.763596 | 2.47E-06 |
| TCONS_00049643 | 2.54E-59 | 3.25005 |
| TCONS_00049644 | 1.77E-64 | 3.96283 |
| TCONS_00041210 | 0.690298 | 2.06E-19 |
| TCONS_00045625 | 0.840781 | 0.052465 |
| TCONS_00057231 | 0.823155 | 0.120904 |
| TCONS_00067331 | 2.88E-05 | 0.770879 |
| TCONS_00057368 | 0.145102 | 1.03749 |
| TCONS_00057367 | 0.533681 | 3.10E-38 |
| TCONS_00051947 | 0.525124 | 0.001065 |
| TCONS_00058045 | 0.564212 | 4.09E-46 |
| TCONS_00068795 | 0.229363 | 5.67E-48 |
| TCONS_00058769 | 0.660678 | 0.001075 |
| TCONS_00059182 | 0.138319 | 5.35E-144 |
| TCONS_00053658 | 0.636945 | 0.002798 |
| TCONS_00060838 | 0.634522 | 0.051452 |
| TCONS_00060925 | 0.00499 | 0.31562 |
| TCONS_00061143 | 0.875832 | 2.48E-17 |
| TCONS_00065699 | 0.180445 | 1.28438 |
| TCONS_00080884 | 1.3572 | 0.130798 |
| TCONS_00076363 | 0.261248 | 0.028301 |
| TCONS_00091100 | 0.219728 | 0.048757 |
| TCONS_00094518 | 1.92425 | 1.51294 |
| TCONS_00094801 | 0.384272 | 0.000489 |
| TCONS_00101475 | 0.120981 | 0.582706 |
| TCONS_00101723 | 0.029755 | 0.231421 |
| TCONS_00099733 | 2.66E-05 | 1.89113 |
| TCONS_00097482 | 0.936914 | 0.224328 |
| TCONS_00103079 | 0.066933 | 0.683905 |
| TCONS_00097709 | 0.692623 | 0.000349 |
| TCONS_00103090 | 1.25E-05 | 0.517886 |
| TCONS_00105667 | 0.494074 | 8.53E-06 |
| TCONS_00106199 | 0.373937 | 9.64E-06 |
| TCONS_00109359 | 2.14E-10 | 0.413296 |
| TCONS_00122554 | 0.40897 | 6.92E-07 |
| TCONS_00119866 | 0.832118 | 0.003113 |
| TCONS_00122553 | 1.02E-06 | 0.556311 |
| TCONS_00122928 | 0.436604 | 2.47E-52 |
| TCONS_00122946 | 1.03467 | 2.99706 |
| TCONS_00123057 | 0.180383 | 0.864993 |
| TCONS_00121248 | 2.31583 | 0.663458 |
| TCONS_00121487 | 0.458434 | 0.000594 |
| TCONS_00140112 | 0.105284 | 0.625309 |
| TCONS_00125828 | 0.236183 | 0.040453 |
| TCONS_00141737 | 1.64E-12 | 1.64044 |
| TCONS_00141738 | 4.58E-11 | 1.34314 |
| TCONS_00142375 | 5.41E-05 | 7.84713 |
| TCONS_00142526 | 0.762774 | 2.43631 |
| TCONS_00134123 | 2.96983 | 0.476781 |
| TCONS_00150872 | 0.590778 | 0.146674 |
| TCONS_00147738 | 0.259178 | 1.34E-05 |
| TCONS_00160563 | 0.200158 | 0.983948 |
| TCONS_00161937 | 1.21E-20 | 0.297544 |
| TCONS_00161935 | 0.306507 | 4.00E-10 |
| TCONS_00157950 | 0.399592 | 1.38107 |
| TCONS_00173388 | 7.33E-05 | 0.809109 |
| TCONS_00169104 | 1.7095 | 0.003569 |
| TCONS_00169111 | 0.004345 | 1.41092 |
| TCONS_00175587 | 0.953421 | 0.12894 |
| TCONS_00175870 | 0.397102 | 0.003599 |
| TCONS_00170319 | 0.000459 | 0.322502 |
| TCONS_00170327 | 0.337723 | 0.003386 |
| TCONS_00170929 | 0.840158 | 0.079117 |
| TCONS_00176918 | 1.30E-05 | 1.61388 |
| TCONS_00181228 | 0.891767 | 1.66E-05 |
| TCONS_00189164 | 1.2857 | 4.58792 |
| TCONS_00189979 | 3.78E-29 | 4.26579 |
| TCONS_00197906 | 0.433722 | 7.73E-60 |
| TCONS_00197964 | 0.427145 | 0.000535 |
| TCONS_00208835 | 1.46E-11 | 0.372473 |
| TCONS_00209449 | 1.15E-05 | 2.85831 |
| TCONS_00221008 | 0.013383 | 1.25196 |
| TCONS_00221030 | 3.10E-09 | 1.01002 |
| TCONS_00223784 | 1.26E-29 | 0.973502 |
| TCONS_00223783 | 1.01E-09 | 0.222556 |
| TCONS_00223788 | 0.850815 | 0.026779 |
| TCONS_00223786 | 1.10061 | 5.1291 |
| TCONS_00212868 | 1.31132 | 0.222712 |
| TCONS_00226415 | 0.250157 | 1.95614 |
| TCONS_00220663 | 0.105984 | 0.750886 |
| TCONS_00234444 | 0.08288 | 0.681849 |
| TCONS_00229763 | 1.99121 | 9.51E-11 |
| TCONS_00229962 | 0.409226 | 2.43886 |
| TCONS_00230431 | 0.384661 | 1.59E-86 |
| TCONS_00230445 | 1.48939 | 0.243949 |
| TCONS_00230411 | 5.61E-51 | 0.893106 |
| TCONS_00230442 | 0.315933 | 1.7118 |
| TCONS_00235491 | 3.37E-08 | 0.639876 |
| TCONS_00233861 | 5.96E-05 | 0.511894 |
| TCONS_00247965 | 7.86E-67 | 1.51666 |
| TCONS_00246764 | 0.331678 | 1.19758 |
| TCONS_00247976 | 0.375174 | 2.16154 |
| TCONS_00247973 | 0.586543 | 2.74E-10 |
| TCONS_00241477 | 0.864408 | 7.06E-09 |
| TCONS_00246999 | 0.001003 | 0.404864 |
| TCONS_00249263 | 1.50E-05 | 0.331003 |
| TCONS_00249513 | 3.61877 | 1.0454 |
| TCONS_00239513 | 8.88E-05 | 0.334966 |
| TCONS_00243667 | 0.615873 | 0.000836 |
| TCONS_00250208 | 0.000427 | 0.21091 |
| TCONS_00247389 | 0.061374 | 0.413781 |
| TCONS_00250876 | 1.05E-16 | 1.13956 |
| TCONS_00250879 | 0.001397 | 2.78118 |
| TCONS_00250884 | 6.96E-05 | 0.56982 |
| TCONS_00250873 | 3.78E-22 | 1.01379 |
| TCONS_00245603 | 1.92181 | 8.39E-13 |
| TCONS_00251386 | 0.000463 | 0.710647 |
| TCONS_00251387 | 0.593968 | 2.66399 |
| TCONS_00252262 | 0.784058 | 0.001599 |
| TCONS_00253902 | 3.36E-05 | 0.143917 |
| TCONS_00254675 | 0.008593 | 0.291838 |
| TCONS_00255116 | 0.001094 | 1.38108 |
| TCONS_00256798 | 0.746773 | 1.32E-05 |
| TCONS_00257451 | 1.69429 | 4.25E-05 |
| TCONS_00267026 | 1.06E-15 | 0.233377 |
| TCONS_00264151 | 0.700704 | 2.15E-09 |
